# Supplementary material
Source: PubMed Central journal article supplement (PMC5388551)
Supplement: supp_fj.201600976R_Supplemental_Data1.pdf [file supp_fj.201600976R_Supplemental_Data1.pdf]

**Supplemental 1:** Transcripts from top inflammatory pathways differentially expressed in colonic  $\rho^0$  and TNF treated (control and  $\rho^0$ ) cells relative to control cells (>|1.5|-fold change compared to control untreated cells, FDR < 0.05, Ebsseq).

| <b>Dendritic Cell Maturation</b>         | $\rho^0$ | TNF    | $\rho^0$ TNF | <b>TREM1 Signaling</b>                         | $\rho^0$ | TNF    | $\rho^0$ TNF |
|------------------------------------------|----------|--------|--------------|------------------------------------------------|----------|--------|--------------|
| ICAM-1                                   | 1.50     | 6.70   | 21.47        | IL-8                                           | 8.33     | 189.61 | 754.67       |
| COL3A1                                   | 18.50    | N/A    | 9.49         | CD54                                           | 1.50     | 6.70   | 21.47        |
| AKT3                                     | 12.56    | N/A    | 14.78        | AKT3                                           | 12.56    | N/A    | 14.78        |
| TLR3                                     | 2.87     | 2.79   | 8.75         | TLR3                                           | 2.87     | 2.79   | 8.75         |
| IL-15                                    | 2.45     | 2.50   | 8.85         | TLR1                                           | 2.44     | N/A    | 1.57         |
| PIK3R3                                   | 5.63     | N/A    | 4.62         | JAK2                                           | 1.58     | N/A    | 1.58         |
| CREB5                                    | 3.16     | N/A    | 5.67         | CD29                                           | 1.60     | N/A    | 1.51         |
| STAT4                                    | 2.48     | N/A    | 1.99         | NLRP2                                          | -1.66    | N/A    | -1.56        |
| CD58                                     | 2.32     | N/A    | 2.08         | NLRP5                                          | -18.98   | N/A    | -44.58       |
| DDR2                                     | 1.80     | N/A    | 2.28         |                                                |          |        |              |
| IRS2                                     | 1.91     | N/A    | 1.72         | <b>NF-<math>\kappa</math>B Signaling</b>       | $\rho^0$ | TNF    | $\rho^0$ TNF |
| PLCD4                                    | 1.53     | N/A    | 2.08         | BMPR1B                                         | 43.12    | N/A    | 16.37        |
| TNFRSF1A                                 | 1.61     | N/A    | 1.60         | AKT3                                           | 12.56    | N/A    | 14.78        |
| JAK2                                     | 1.58     | N/A    | 1.58         | MAP3K8                                         | 2.56     | 5.02   | 9.16         |
| TRAF6                                    | 1.50     | N/A    | 1.61         | EGF                                            | 9.13     | N/A    | 6.80         |
| HLA-DRB1                                 | -1.74    | N/A    | N/A          | TLR3                                           | 2.87     | 2.79   | 8.75         |
| HLA-DQB1                                 | -1.75    | N/A    | N/A          | PIK3R3                                         | 5.63     | N/A    | 4.62         |
| IRS1                                     | -1.61    | N/A    | -1.88        | TGFA                                           | 2.02     | 1.56   | 2.49         |
|                                          |          |        |              | TLR1                                           | 2.44     | N/A    | 1.57         |
| <b>IL-8 Signaling</b>                    | $\rho^0$ | TNF    | $\rho^0$ TNF | MAP3K1                                         | 1.66     | N/A    | 2.27         |
| IL-8                                     | 8.33     | 189.61 | 754.67       | IRS2                                           | 1.91     | N/A    | 1.72         |
| ICAM1                                    | 1.50     | 6.70   | 21.47        | BMPR2                                          | 1.85     | N/A    | 1.64         |
| AKT3                                     | 12.56    | N/A    | 14.78        | MRAS                                           | 1.60     | N/A    | 1.64         |
| IRAK2                                    | 2.73     | 8.00   | 15.70        | TNFRSF1A                                       | 1.61     | N/A    | 1.60         |
| EGF                                      | 9.13     | N/A    | 6.80         | TRAF6                                          | 1.50     | N/A    | 1.61         |
| ITGB3                                    | 7.03     | N/A    | 7.03         | TNFSF13B                                       | 2.00     | N/A    | N/A          |
| PIK3R3                                   | 5.63     | N/A    | 4.62         | BIMP1                                          | -2.18    | N/A    | N/A          |
| JUN                                      | 1.82     | 2.40   | 4.06         | TRAF2                                          | -2.46    | N/A    | N/A          |
| RND3                                     | 2.07     | 1.83   | 3.30         | IRS1                                           | -1.61    | N/A    | -1.88        |
| HMOX1                                    | 1.81     | 1.70   | 2.80         |                                                |          |        |              |
| HBEGF                                    | 2.44     | N/A    | 3.68         | <b>Acute Phase Response Signaling</b>          | $\rho^0$ | TNF    | $\rho^0$ TNF |
| IRS2                                     | 1.91     | N/A    | 1.72         | SERPINA1                                       | 6.21     | 2.78   | 25.56        |
| MRAS                                     | 1.60     | N/A    | 1.64         | NFKBIA                                         | 1.26     | 14.88  | 17.01        |
| ANGPT2                                   | 1.61     | N/A    | 1.61         | AKT3                                           | 12.56    | N/A    | 14.78        |
| TRAF6                                    | 1.50     | N/A    | 1.61         | FN1                                            | 6.14     | N/A    | 5.46         |
| PRKCE                                    | 1.52     | N/A    | 1.57         | PIK3R3                                         | 5.63     | N/A    | 4.62         |
| FIGF                                     | 2.56     | N/A    | N/A          | c-Jun                                          | 1.82     | 2.40   | 4.06         |
| DIRAS3                                   | -2.52    | N/A    | N/A          | FGG                                            | 7.33     | N/A    | N/A          |
| IRS1                                     | -1.61    | N/A    | -1.88        | HMOX1                                          | 1.81     | 1.70   | 2.80         |
| GNB3                                     | -2.12    | N/A    | -1.67        | IL1RAP                                         | 2.32     | N/A    | 2.34         |
| GNAI1                                    | -1.90    | N/A    | -2.21        | Ferritin                                       | 1.98     | N/A    | 2.50         |
| GNG5                                     | -2.19    | N/A    | -2.21        | NR3C1                                          | 2.03     | N/A    | 2.10         |
| CR2                                      | -2.41    | N/A    | -2.57        | MAP3K1                                         | 1.66     | N/A    | 2.27         |
| RHOU                                     | -3.40    | -2.22  | -6.72        | MRAS                                           | 1.60     | N/A    | 1.64         |
|                                          |          |        |              | TNFRSF1A                                       | 1.61     | N/A    | 1.60         |
| <b>IL-6 Signaling</b>                    | $\rho^0$ | TNF    | $\rho^0$ TNF | JAK2                                           | 1.58     | N/A    | 1.58         |
| CXCL8                                    | 8.33     | 189.61 | 754.67       | TRAF6                                          | 1.50     | N/A    | 1.61         |
| AKT3                                     | 12.56    | N/A    | 14.78        | TRAF2                                          | -2.46    | N/A    | N/A          |
| MDR1                                     | 5.96     | N/A    | 6.11         |                                                |          |        |              |
| PIK3R3                                   | 5.63     | N/A    | 4.62         | <b>NRF2-mediated Oxidative Stress Response</b> | $\rho^0$ | TNF    | $\rho^0$ TNF |
| JUN                                      | 1.82     | 2.40   | 4.06         | SQSTM1                                         | 2.11     | 3.02   | 5.25         |
| IL1RAP                                   | 2.32     | N/A    | 2.34         | PIK3R3                                         | 5.63     | N/A    | 4.62         |
| IRS2                                     | 1.91     | N/A    | 1.72         | TXNRD1                                         | 1.98     | 1.98   | 4.46         |
| MRAS                                     | 1.60     | N/A    | 1.64         | JUN                                            | 1.82     | 2.40   | 4.06         |
| TNFRSF1A                                 | 1.61     | N/A    | 1.60         | HMOX1                                          | 1.81     | 1.70   | 2.80         |
| JAK2                                     | 1.58     | N/A    | 1.58         | HSPB8                                          | 3.01     | N/A    | 2.84         |
| TRAF6                                    | 1.50     | N/A    | 1.61         | FTL                                            | 1.98     | N/A    | 2.50         |
| TRAF2                                    | -2.46    | N/A    | N/A          | DNAJB5                                         | 1.83     | N/A    | 2.46         |
| IRS1                                     | -1.61    | N/A    | -1.88        | EPHX1                                          | 2.00     | N/A    | 2.11         |
|                                          |          |        |              | MAP3K1                                         | 1.66     | N/A    | 2.27         |
| <b>Leukocyte Extravasation Signaling</b> | $\rho^0$ | TNF    | $\rho^0$ TNF | IRS2                                           | 1.91     | N/A    | 1.72         |
| MMP13                                    | 42.80    | N/A    | 54.66        | GCLC                                           | 1.65     | N/A    | 1.94         |
| ICAM1                                    | 1.50     | 6.70   | 21.47        | MRAS                                           | 1.60     | N/A    | 1.64         |
| MMP7                                     | 3.02     | 10.25  | 14.51        | PRKCE                                          | 1.52     | N/A    | 1.57         |

**Leukocyte Extravasation Signaling (continued)**

|        |        |      |       |
|--------|--------|------|-------|
| MMP19  | 3.10   | 2.89 | 9.18  |
| ITGB3  | 7.03   | N/A  | 7.03  |
| CXCR4  | 2.38   | 5.32 | 5.23  |
| PIK3R3 | 5.63   | N/A  | 4.62  |
| MMP1   | 9.25   | N/A  | N/A   |
| MMP16  | 5.82   | N/A  | N/A   |
| SELPLG | 2.57   | N/A  | 2.58  |
| RASSF5 | 1.73   | N/A  | 2.11  |
| IRS2   | 1.91   | N/A  | 1.72  |
| ITGA2  | 1.51   | N/A  | 1.77  |
| ITGB1  | 1.60   | N/A  | 1.51  |
| PRKCE  | 1.52   | N/A  | 1.57  |
| MMP28  | 2.68   | N/A  | N/A   |
| ACTA2  | 1.52   | N/A  | N/A   |
| VAV2   | -1.71  | N/A  | N/A   |
| IRS1   | -1.61  | N/A  | -1.88 |
| CLDN7  | -1.85  | N/A  | -1.79 |
| GNAI1  | -1.90  | N/A  | -2.21 |
| CLDN22 | -57.60 | N/A  | N/A   |

**Role of Pattern Recognition Receptors in Recognition of Bacteria and Viruses**

|        | $\rho^0$ | TNF    | $\rho^0$ TNF |
|--------|----------|--------|--------------|
| CXCL8  | 8.33     | 189.61 | 754.67       |
| MDA-5  | 1.44     | 4.56   | 14.67        |
| TLR3   | 2.87     | 2.79   | 8.75         |
| PIK3R3 | 5.63     | N/A    | 4.62         |
| RIG-1  | 1.67     | 2.44   | 5.36         |
| MYD88  | 1.28     | 1.17   | 1.94         |
| TLR1   | 2.44     | N/A    | 1.57         |
| IRS2   | 1.91     | N/A    | 1.72         |
| TRAF6  | 1.50     | N/A    | 1.61         |
| PRKCE  | 1.52     | N/A    | 1.57         |
| TGFB3  | 2.81     | N/A    | N/A          |
| TGFB2  | 2.28     | N/A    | N/A          |
| IRS1   | -1.61    | N/A    | -1.88        |
| IL17D  | -1.85    | N/A    | -2.11        |
| SYK    | -3.92    | N/A    | -3.59        |

**Tec Kinase Signaling**

|           | $\rho^0$ | TNF   | $\rho^0$ TNF |
|-----------|----------|-------|--------------|
| PIK3R3    | 5.63     | N/A   | 4.62         |
| TNFSF10   | 3.20     | N/A   | 5.00         |
| FAS       | 2.01     | 1.90  | 3.68         |
| RND3      | 2.07     | 1.83  | 3.30         |
| TNFRSF10B | 1.50     | 1.86  | 2.83         |
| STAT4     | 2.48     | N/A   | 1.99         |
| IRS2      | 1.91     | N/A   | 1.72         |
| ITGA2     | 1.51     | N/A   | 1.77         |
| MRAS      | 1.60     | N/A   | 1.64         |
| JAK2      | 1.58     | N/A   | 1.58         |
| ITGB1     | 1.60     | N/A   | 1.51         |
| PRKCE     | 1.52     | N/A   | 1.57         |
| ACTA2     | 1.52     | N/A   | N/A          |
| PAK6      | -1.55    | N/A   | N/A          |
| VAV2      | -1.71    | N/A   | N/A          |
| DIRAS3    | -2.52    | N/A   | N/A          |
| IRS1      | -1.61    | N/A   | -1.88        |
| GNB3      | -2.12    | N/A   | -1.67        |
| GNAI1     | -1.90    | N/A   | -2.21        |
| GNG5      | -2.19    | N/A   | -2.21        |
| RHOU      | -3.40    | -2.22 | -6.72        |

**NRF2-mediated Oxidative Stress Response (continued)**

|        |       |     |       |
|--------|-------|-----|-------|
| ACTA2  | 1.52  | N/A | N/A   |
| CLPP   | -1.61 | N/A | N/A   |
| IRS1   | -1.61 | N/A | -1.88 |
| SCARB1 | -2.44 | N/A | -2.10 |

**LPS-stimulated MAPK Signaling**

|        | $\rho^0$ | TNF  | $\rho^0$ TNF |
|--------|----------|------|--------------|
| PIK3R3 | 5.63     | N/A  | 4.62         |
| c-Jun  | 1.82     | 2.40 | 4.06         |
| IRS2   | 1.91     | N/A  | 1.72         |
| MRAS   | 1.60     | N/A  | 1.64         |
| PRKCE  | 1.52     | N/A  | 1.57         |
| IRS1   | -1.61    | N/A  | -1.88        |

**B Cell Receptor Signaling**

|        | $\rho^0$ | TNF   | $\rho^0$ TNF |
|--------|----------|-------|--------------|
| DAPP1  | 7.08     | 9.87  | 48.81        |
| AKT3   | 12.56    | N/A   | 14.78        |
| ETS1   | 3.92     | 3.68  | 11.26        |
| MAP3K8 | 2.56     | 5.02  | 9.16         |
| PIK3R3 | 5.63     | N/A   | 4.62         |
| CREB5  | 3.16     | N/A   | 5.67         |
| JUN    | 1.82     | 2.40  | 4.06         |
| GAB2   | 2.96     | N/A   | 3.60         |
| PAG1   | 3.06     | N/A   | 2.31         |
| MAP3K1 | 1.66     | N/A   | 2.27         |
| RASSF5 | 1.73     | N/A   | 2.11         |
| IRS2   | 1.91     | N/A   | 1.72         |
| NFAT5  | 2.04     | N/A   | 1.54         |
| MRAS   | 1.60     | N/A   | 1.64         |
| MAP3K2 | 1.46     | N/A   | 1.71         |
| VAV2   | -1.71    | N/A   | N/A          |
| CARD11 | -2.18    | N/A   | N/A          |
| IRS1   | -1.61    | N/A   | -1.88        |
| EGR1   | -2.47    | N/A   | -3.64        |
| Syk    | -3.92    | N/A   | -3.59        |
| MEF2C  | -4.85    | -1.89 | -6.67        |
| IL1RAP | 2.32     | N/A   | 2.34         |
| MAP3K1 | 1.66     | N/A   | 2.27         |
| TRAF6  | 1.50     | N/A   | 1.61         |
| ADCY3  | -1.77    | N/A   | N/A          |
| JUN    | 1.82     | 2.40  | 4.06         |
| SYK    | -3.92    | N/A   | -3.59        |

**Toll-like Receptor Signaling**

|        | $\rho^0$ | TNF  | $\rho^0$ TNF |
|--------|----------|------|--------------|
| IRAK2  | 2.73     | 8.00 | 15.70        |
| TLR3   | 2.87     | 2.79 | 8.75         |
| JUN    | 1.82     | 2.40 | 4.06         |
| TLR1   | 2.44     | N/A  | 1.57         |
| MAP3K1 | 1.66     | N/A  | 2.27         |
| TRAF6  | 1.50     | N/A  | 1.61         |

**Barrier Function Signaling**

|          | $\rho^0$ | TNF  | $\rho^0$ TNF |
|----------|----------|------|--------------|
| AKT3     | 12.56    | N/A  | 14.78        |
| JUN      | 1.82     | 2.40 | 4.06         |
| PPP2R5B  | 2.24     | N/A  | 3.23         |
| ARHGEF2  | 1.69     | N/A  | 1.89         |
| TNFRSF1A | 1.61     | N/A  | 1.60         |
| TGFB3    | 2.81     | N/A  | N/A          |
| TGFB2    | 2.28     | N/A  | N/A          |
| ACTA2    | 1.52     | N/A  | N/A          |
| CDK4     | -1.76    | N/A  | -1.60        |
| CLDN7    | -1.85    | N/A  | -1.79        |
| NUDT21   | -1.79    | N/A  | -1.87        |
| PRKAR1B  | -2.20    | N/A  | -1.68        |
| NECTIN3  | -1.96    | N/A  | -2.36        |
| VT11A    | -2.10    | N/A  | -2.36        |
| CLDN22   | -57.60   | N/A  | N/A          |
