# Supplementary material
Source: PubMed Central journal article supplement (PMC5388551)
Supplement: supp_fj.201600976R_Supplemental_Data2.pdf [file supp_fj.201600976R_Supplemental_Data2.pdf]

**Supplemental 2:** Transcripts associated with AMPK signaling pathway differentially expressed in colonic  $\rho^0$  and TNF treated (control and  $\rho^0$ ) cells relative to control cells ( $>|1.5|$ -fold change compared to control untreated cells , FDR < 0.05, Ebsseq).

| <b>AMPK Signaling pathway</b> | <b><math>\rho^0</math></b> | <b>TNF</b> | <b><math>\rho^0</math> TNF</b> |
|-------------------------------|----------------------------|------------|--------------------------------|
| AKT3                          | 12.56                      | N/A        | 14.78                          |
| PRKAA2                        | 8.41                       | N/A        | 6.49                           |
| ADRB2                         | 6.68                       | N/A        | 6.07                           |
| PIK3R3                        | 5.63                       | N/A        | 4.62                           |
| CREB5                         | 3.16                       | N/A        | 5.67                           |
| p21                           | 3.86                       | N/A        | 4.07                           |
| PPP2R5B                       | 2.24                       | N/A        | 3.23                           |
| IRS2                          | 1.91                       | N/A        | 1.72                           |
| GLUT1                         | 1.97                       | N/A        | 1.65                           |
| MRAS                          | 1.60                       | N/A        | 1.64                           |
| ULK1                          | 1.62                       | N/A        | 1.58                           |
| PPP2R3B                       | -1.79                      | N/A        | N/A                            |
| SMARCD2                       | -1.66                      | N/A        | -1.62                          |
| CHRNA5                        | -1.70                      | N/A        | -1.66                          |
| CCNA2                         | -1.61                      | N/A        | -1.83                          |
| IRS1                          | -1.61                      | N/A        | -1.88                          |
| PRKAR1B                       | -2.20                      | N/A        | -1.68                          |
| AK7                           | -2.01                      | N/A        | -2.89                          |
| ACACA                         | -2.51                      | N/A        | -2.72                          |

© 2000-2016 QIAGEN. All rights reserved.
