# Supplementary material
Source: PubMed Central journal article supplement (PMC5388551)

**Supplemental 3:** In colonic p<sup>0</sup> cells, differentially expressed transcripts predict activation of AMPK pathway. IPA of AMPK associated transcripts; activation color score: red: ↑ expression, green: ↓ expression, orange: predicted activation, blue: predicted inactivation.

AMPK Signaling

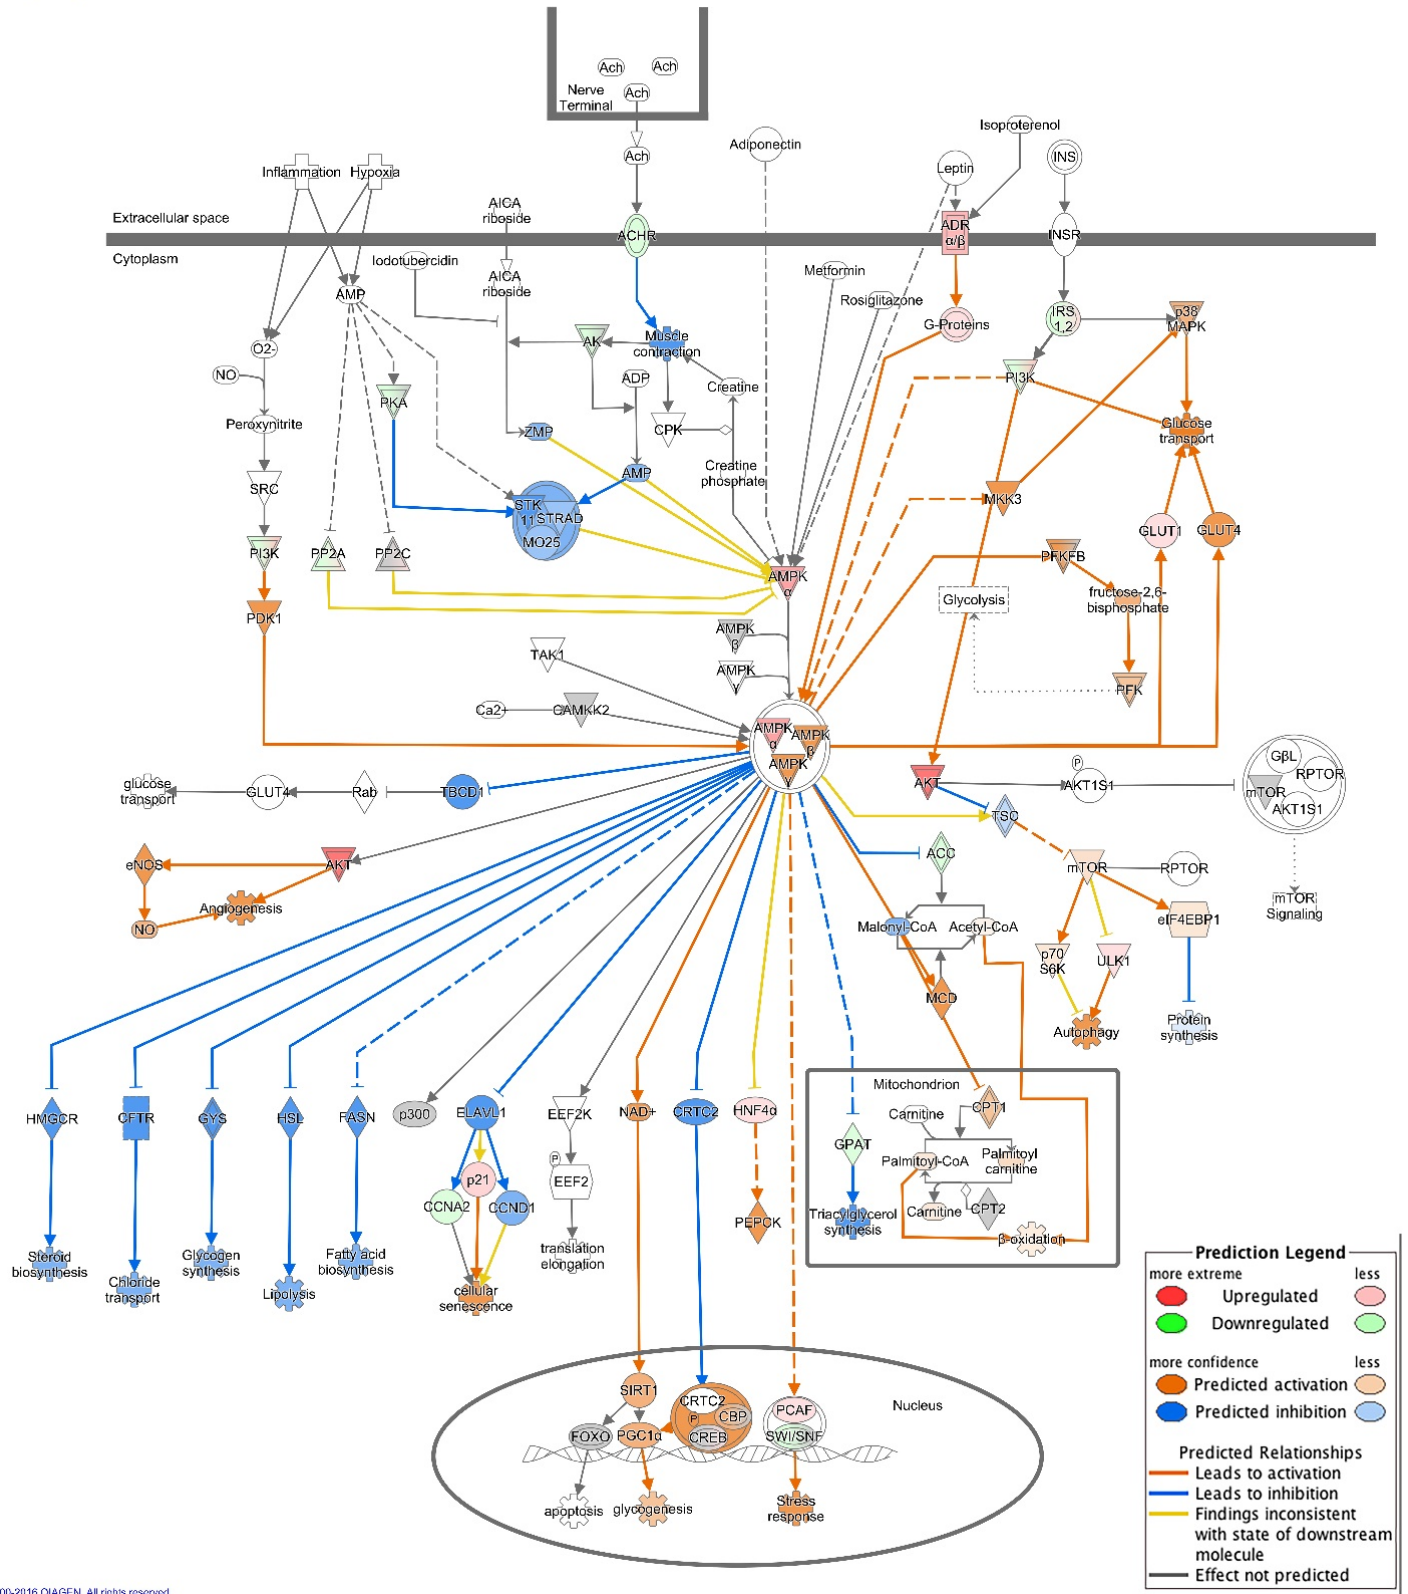

Supplement: supp_fj.201600976R_Supplemental_Data3.pdf [file supp_fj.201600976R_Supplemental_Data3.pdf]
